# Supplementary material
Source: bioRxiv or medRxiv preprint supplement (https://www.medrxiv.org/highwire/filestream/74542/field_highwire_adjunct_files/0/19013078-1.pdf)
Supplement: Supplementary file [file 19013078-1.pdf]

# A Metabolomics Approach for Early Prediction of Vincristine-Induced Peripheral Neuropathy—Supplementary document

Parul Verma      Jayachandran Devaraj      Jodi L. Skiles      Tammy Sajdyk      Ellen M. L. Smith  
Richard H. Ho      Raymond Hutchinson      Elizabeth Wells      Lang Li      Jamie Renbarger  
                                 Bruce Cooper                                   Doraiswami Ramkrishna

## 1 Metabolite selection

In this section, we have provided details on feature selection by recursive feature elimination (RFE). Supplementary Table S1 describes the model accuracy along with sensitivity and specificity for each time point.

After the final feature selection preceded by manual peak integration, models were evaluated using cross validation. Subsequently, models were trained using the complete data and then the threshold for probability was selected. For this selection, various thresholds were tried and specific metrics were evaluated. See Supplementary Fig. S1 for model performance upon changing the probability threshold. Threshold of 0.7, 0.65, and 0.7 was chosen for day 8, day 29, and month 6 models respectively.

After selection of probability threshold, model accuracy was estimated based on the confusion matrices. Confusion matrices for the three time points are shown in Supplementary Table S2.

Supplementary Table S1: Metrics obtained by performing recursive feature elimination on the data sets at the three time points. A: Set of metabolites found that can accurately predict overall neuropathy susceptibility at these time points before manual integration of peaks. B: Set of metabolites found that can accurately predict TNS $\odot$ -PV intensity at that specific time point. C: Set of metabolites that can accurately predict overall neuropathy susceptibility at the time points after manual integration of peaks. AUROC: Area Under Receiver Operating Characteristics Curve, Sens: Sensitivity, Spec: Specificity, AUROCSD, SensSD, SpecSD are standard deviations for AUROC, sensitivity and specificity. Sensitivity and specificity are calculated by keeping 0.5 probability as the threshold. Note: positive class is overall susceptibility to high neuropathy (HN) for A and C, and TNS $\odot$ -PV greater than 8 for B.

|   | Time point | Predictors | AUROC | Sens  | Spec  | AUROCSD | SensSD | SpecSD |
|---|------------|------------|-------|-------|-------|---------|--------|--------|
| A | Day 8      | 5          | 0.968 | 0.906 | 0.793 | 0.048   | 0.122  | 0.255  |
|   | Day 29     | 46         | 0.946 | 0.936 | 0.781 | 0.060   | 0.090  | 0.182  |
|   | Month 6    | 42         | 0.963 | 0.900 | 0.918 | 0.043   | 0.076  | 0.152  |
| B | Day 29     | 2          | 0.831 | 0.464 | 0.865 | 0.120   | 0.259  | 0.092  |
|   | Month 6    | 1955       | 0.812 | 0.776 | 0.617 | 0.086   | 0.206  | 0.204  |
| C | Day 8      | 6          | 0.938 | 0.883 | 0.677 | 0.047   | 0.130  | 0.261  |
|   | Day 29     | 46         | 0.861 | 0.865 | 0.618 | 0.122   | 0.210  | 0.208  |
|   | Month 6    | 42         | 0.923 | 0.844 | 0.830 | 0.069   | 0.119  | 0.159  |

Supplementary Table S2: Confusion matrix generated after training the final models with the final selected thresholds for each time point.

| Time points            | Day 8 |     | Day 29 |     | Month 6 |     |
|------------------------|-------|-----|--------|-----|---------|-----|
| Reference \ Prediction | High  | Low | High   | Low | High    | Low |
| High                   | 411   | 32  | 387    | 85  | 362     | 15  |
| Low                    | 69    | 128 | 91     | 155 | 118     | 225 |

## 2 Metabolite identification

After the metabolites were finally chosen and models were trained using them, we attempted to identify the metabolites based on their m/z, retention time, MS/MS when available, and adduct information. Supplementary Table S3 shows m/z, retention

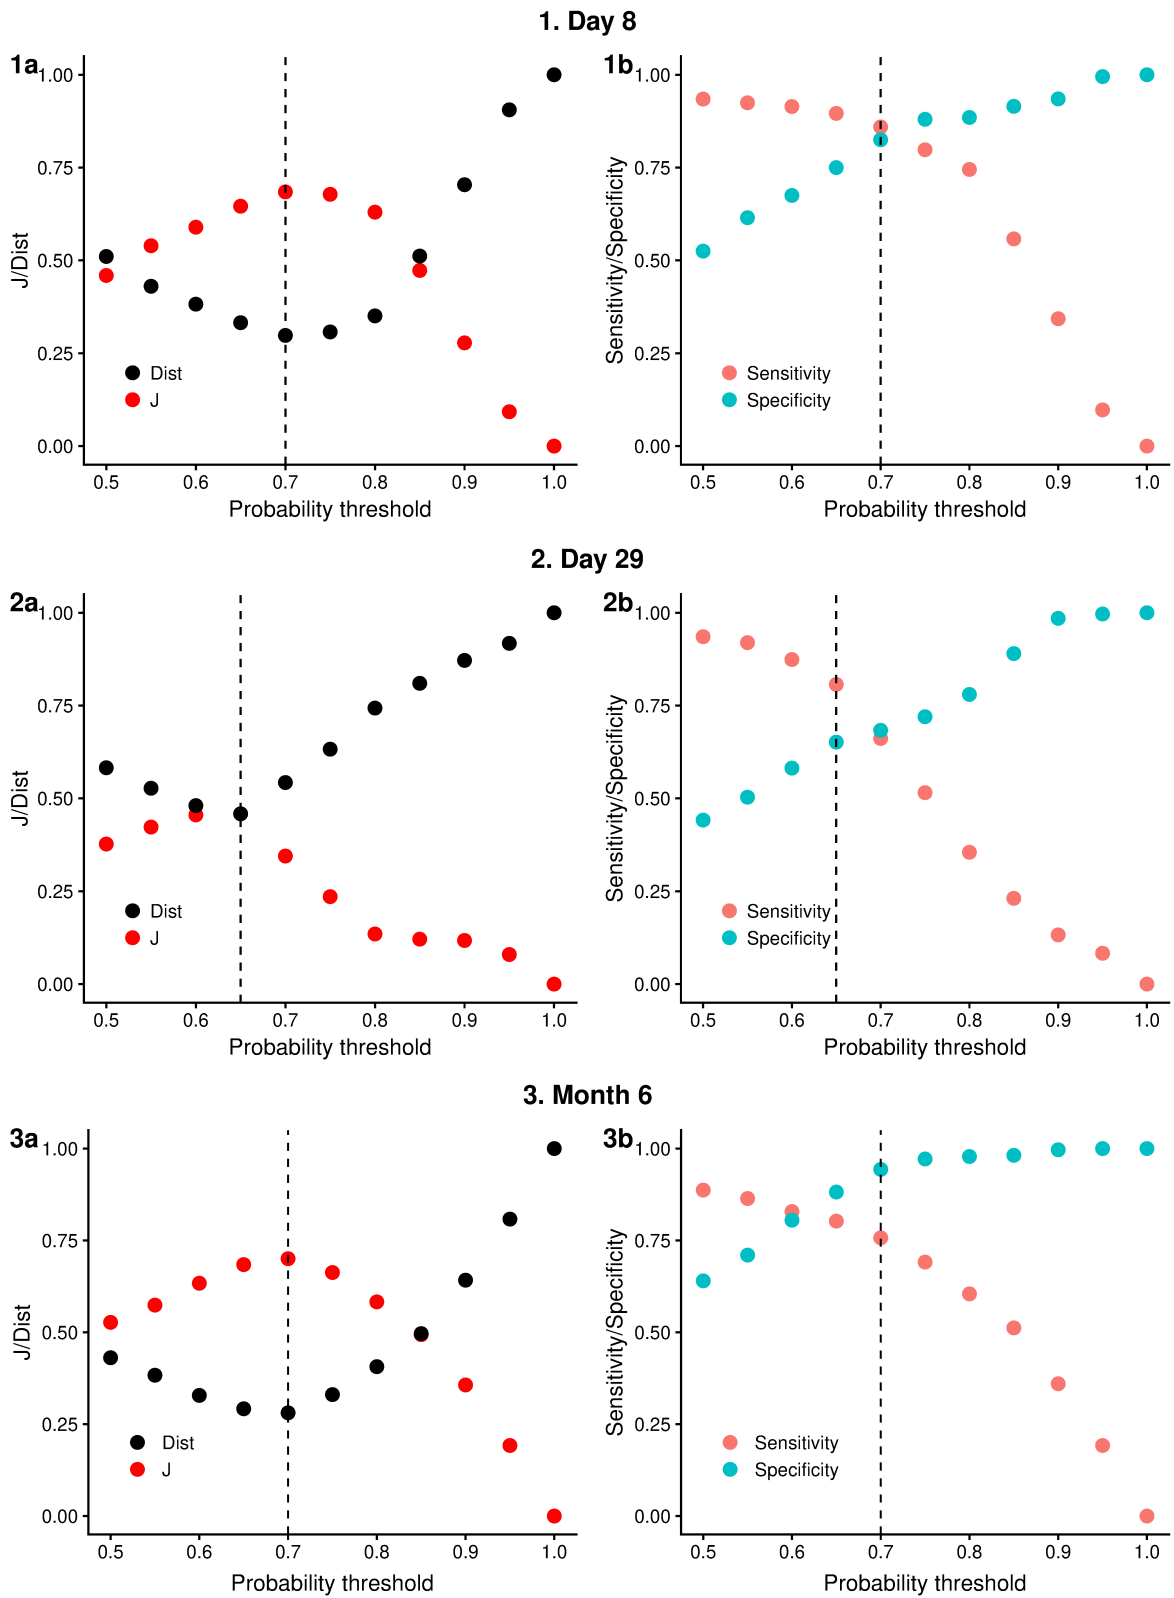

Supplementary Figure S1: The three plots show the metrics evaluated at different probability thresholds. 1a, 2a and 3b show the plot of Youden's J statistic (J) and distance (dist) to best possible cutoff (i.e. sensitivity and specificity equal to 1) at different probability thresholds, at day 8, day 29 and Month 6 data respectively. The probability threshold is for high neuropathy. If the SVM model output is greater than the threshold, the sample is classified as high, and vice versa. 1b, 2b, and 3b show how the sensitivity and specificity varies as a function of probability threshold. Vertical line corresponds to the chosen threshold, based on minimum dist.

time, and adduct information information for the final 2 chosen metabolites. Supplementary Table S4 shows the aforementioned information along with HMDB ID, when possible, for day 29 metabolites. Supplementary Table S5 shows m/z, retention time, adduct information and HMDB ID for month 6 metabolites.

Supplementary Table S3: Mass, retention time, and adduct information for the final set of Day 8 metabolites. None of them could be identified

| Mass (Da) | Retention time (min) | Adducts       |
|-----------|----------------------|---------------|
| 674.0002  | 11.99401             | Not specified |
| 272.1622  | 13.85099             | M+Na          |

Supplementary Table S4: Mass, retention time, and adduct information for the final set of day 29 metabolites. 4 of them could be identified.

| Mass (Da) | Retention time (min) | Adducts       | HMDB ID     |
|-----------|----------------------|---------------|-------------|
| 174.1012  | 0.956001             | Not specified | HMDB0003357 |
| 378.1285  | 8.478009             | Not specified |             |
| 188.0794  | 0.981001             | M+H           |             |
| 228.1216  | 0.877999             | M+H           |             |
| 508.2309  | 19.18899             | M+Na          |             |
| 331.3234  | 19.89402             | M+H           |             |
| 239.2243  | 18.43899             | Not specified |             |
| 666.2225  | 1.045999             | M+Na          | HMDB0000757 |
| 996.6191  | 19.91397             | Not specified |             |
| 271.2508  | 18.65903             | M+H           |             |
| 347.0629  | 1.77                 | Not specified | HMDB0000045 |
| 320.1222  | 7.380997             | Not specified |             |
| 159.0681  | 4.028006             | Not specified |             |
| 427.0289  | 1.273001             | 2M+H          | HMDB0001341 |

Supplementary Table S5: Mass, retention time, and adduct information for the final set of month 6 metabolites. 9 of them could be identified.

| Mass (Da) | Retention time (min) | Adducts       | HMDB ID     |
|-----------|----------------------|---------------|-------------|
| 147.089   | 0.8                  | M+H           |             |
| 129.0789  | 0.802                | M+Na          | HMDB0000716 |
| 128.0476  | 5.724                | M+H           |             |
| 385.2012  | 20.22098             | M+H           |             |
| 700.5516  | 20.26798             | M+H           | HMDB0013464 |
| 368.1754  | 20.22302             | M+Na          |             |
| 188.1267  | 0.710999             | Not specified | HMDB0000670 |
| 310.1162  | 5.135994             | M+H           | HMDB0001961 |
| 301.2614  | 19.797               | Not specified |             |
| 523.2933  | 20.203               | M+H           |             |
| 803.5453  | 20.15502             | Not specified |             |
| 493.3173  | 19.99401             | M+Na          | HMDB0010383 |
| 612.152   | 3.328002             | Not specified | HMDB0003337 |
| 496.2249  | 10.36499             | Not specified |             |
| 294.1104  | 19.604               | M+H           |             |
| 428.2253  | 9.986008             | M+Na          |             |
| 260.1371  | 6.119996             | Not specified | HMDB0011170 |
| 177.0788  | 1.277                | Not specified | HMDB0001855 |
| 414.2041  | 19.96998             | Not specified |             |
| 262.1315  | 8.763993             | Not specified | HMDB0011177 |
| 208.1098  | 19.21399             | M+H           |             |

### 3 Pathway analysis

We used Metaboanalyst to perform pathway analysis for the identified metabolites for day 29 and month 6 data. Supplementary Tables S6 and S7 show the results from metaboanalyst for these two time points respectively. None of the pathways were significant.

Supplementary Table S6: Table generated from Metaboanalyst for day 29 metabolites

| Pathway Name          | Total | Expected | Hits | Raw p   | $-\log(p)$ | Holm adjust | FDR     | Impact |
|-----------------------|-------|----------|------|---------|------------|-------------|---------|--------|
| Purine metabolism     | 65    | 0.17     | 2    | 9.84E-3 | 4.62       | 8.27E-1     | 8.27E-1 | 0.09   |
| Arginine biosynthesis | 14    | 0.04     | 1    | 3.57E-2 | 3.33       | 1           | 1       | 0      |

Supplementary Table S7: Table generated from Metaboanalyst for month 6 metabolites

| Pathway Name                   | Total | Expected | Hits | Raw p   | $-\log(p)$ | Holm adjust | FDR | Impact |
|--------------------------------|-------|----------|------|---------|------------|-------------|-----|--------|
| Sphingolipid metabolism        | 21    | 0.07     | 1    | 6.60E-2 | 2.72       | 1           | 1   | 0      |
| Glutathione metabolism         | 28    | 0.09     | 1    | 8.72E-2 | 2.44       | 1           | 1   | 0.03   |
| Glycerophospholipid metabolism | 36    | 0.12     | 1    | 1.11E-1 | 2.20       | 1           | 1   | 0.02   |
| Lysine degradation             | 25    | 0.08     | 1    | 7.82E-2 | 2.55       | 1           | 1   | 0      |
